# Supplementary material for: Identification of Cellular Compositions in Different Microenvironments and Their Potential Impacts on Hematopoietic Stem Cells HSCs Using Single-Cell RNA Sequencing with Systematical Confirmation
Source: Life (Basel). 2023 Nov 2;13(11):2157. doi: 10.3390/life13112157 (PMC10671877; doi:10.3390/life13112157)
Supplement: Supplementary file 1 [file life-13-02157-s001.zip › life-2611578-supplementary Table S6.xlsx]

## Sheet: sigup_mp
gene	p_val	avg_log2FC	pct.1	pct.2	p_val_adj
Git2	3.91e-188	0.250289	0.717	0.625	1.14e-183
Abcd1	5.89e-199	0.250825	0.464	0.33	1.72e-194
Nfkb2	1.44e-166	0.250906	0.366	0.246	4.22e-162
Ubxn6	5.26e-181	0.251298	0.561	0.465	1.54e-176
Gng12	1.7e-303	0.251389	0.794	0.561	4.96e-299
Rgmb	0	0.251409	0.335	0.106	0
Phf20	3.79e-164	0.251643	0.556	0.46	1.11e-159
Nfxl1	5.27e-156	0.251784	0.372	0.26	1.54e-151
Chmp1a	9.41e-176	0.251819	0.681	0.612	2.75e-171
Fau	8.69e-257	0.252123	0.997	0.983	2.54e-252
Ctdnep1	3.2e-174	0.252217	0.717	0.656	9.35e-170
Ikbkb	1.47e-166	0.252303	0.56	0.481	4.29e-162
Dmxl2	0	0.252395	0.295	0.093	0
Ergic3	1.93e-182	0.252616	0.791	0.707	5.64e-178
Ift22	1e-206	0.252854	0.455	0.322	2.93e-202
Cers5	1.68e-213	0.253331	0.512	0.351	4.92e-209
Atg5	1.29e-154	0.253612	0.631	0.572	3.77e-150
Map3k1	3.13e-171	0.253755	0.497	0.381	9.16e-167
mt-Co1	0	0.25381	0.993	0.975	0
Vgll4	1.13e-160	0.253954	0.488	0.384	3.3e-156
Pink1	8.47e-183	0.253969	0.43	0.299	2.48e-178
Zswim8	6.34e-244	0.254378	0.459	0.287	1.85e-239
Fndc3b	0	0.254488	0.586	0.235	0
Cnp	6.83e-192	0.25499	0.454	0.323	2e-187
Pak1	1.11e-189	0.254992	0.526	0.389	3.24e-185
Necap1	5.94e-228	0.255081	0.394	0.241	1.74e-223
Aamp	6.02e-180	0.255083	0.839	0.753	1.76e-175
Dennd1b	1.98e-160	0.255106	0.461	0.359	5.79e-156
9530056E24Rik	3.69e-288	0.255239	0.304	0.131	1.08e-283
Pacs2	1.87e-192	0.255358	0.442	0.319	5.46e-188
Cep250	3.21e-141	0.25565	0.56	0.494	9.39e-137
Acvrl1	0	0.255849	0.29	0.053	0
Ostm1	7.42e-200	0.255921	0.44	0.311	2.17e-195
Tmx4	7.88e-154	0.256008	0.576	0.493	2.3e-149
Crk	8.83e-179	0.256265	0.647	0.544	2.58e-174
Parp12	0	0.256304	0.302	0.072	0
Mpnd	7.6e-225	0.256698	0.474	0.327	2.22e-220
Rab12	3.21e-260	0.25726	0.555	0.36	9.38e-256
Cwc15	9.33e-175	0.257409	0.901	0.826	2.73e-170
Cryl1	3.36e-302	0.257432	0.374	0.187	9.82e-298
Fosb	9.88e-102	0.257714	0.578	0.471	2.89e-97
Fmn1	0	0.257998	0.303	0.092	0
Tfeb	0	0.258267	0.327	0.106	0
Gsap	0	0.258311	0.28	0.052	0
Tnfaip1	0	0.258383	0.525	0.287	0
Cracr2b	0	0.258431	0.292	0.053	0
Akt1	5.73e-236	0.258528	0.857	0.735	1.67e-231
Tshz3	0	0.258905	0.291	0.09	0
Pttg1ip	6.65e-240	0.259119	0.653	0.503	1.94e-235
Calhm2	0	0.259268	0.32	0.113	0
Nhlrc3	4.57e-299	0.259299	0.357	0.177	1.34e-294
AU020206	1.11e-148	0.2593	0.539	0.446	3.25e-144
Cmtm4	0	0.259341	0.387	0.191	0
Wdr26	2.02e-293	0.259537	0.898	0.843	5.9e-289
Washc5	6.68e-209	0.259659	0.519	0.388	1.95e-204
Rxra	3.42e-246	0.259857	0.36	0.2	9.99e-242
Mfap3	8.7e-203	0.26014	0.434	0.305	2.54e-198
Copa	3.46e-222	0.260564	0.809	0.697	1.01e-217
Mtus1	1.31e-270	0.260579	0.407	0.208	3.82e-266
Ppp1r21	8.8e-220	0.260639	0.45	0.313	2.57e-215
Mapkapk2	1.51e-226	0.260687	0.739	0.595	4.4e-222
Maf1	1.41e-188	0.260869	0.675	0.607	4.12e-184
Atg3	2.53e-185	0.260971	0.736	0.665	7.38e-181
Appl2	0	0.261479	0.324	0.107	0
Tmem159	0	0.261653	0.385	0.191	0
Tet3	4.76e-160	0.261837	0.615	0.545	1.39e-155
Dennd4c	1.38e-223	0.261838	0.393	0.249	4.02e-219
Nrbp1	4.05e-192	0.262069	0.652	0.579	1.18e-187
Rab11b	9.68e-184	0.262126	0.795	0.742	2.83e-179
Dclre1c	6.47e-296	0.26268	0.326	0.147	1.89e-291
Fgd3	0	0.262726	0.31	0.098	0
Clec7a	0	0.262728	0.271	0.075	0
Tpm4	0	0.262988	0.886	0.444	0
Ddi2	7.46e-178	0.262991	0.607	0.528	2.18e-173
Lactb	8.26e-176	0.263258	0.585	0.493	2.42e-171
Myl12b	1.18e-272	0.263941	0.785	0.657	3.46e-268
Fer	2.36e-238	0.26423	0.426	0.271	6.9e-234
Csk	1.96e-192	0.264261	0.785	0.682	5.73e-188
Gm37084	9.8e-236	0.264437	0.365	0.201	2.87e-231
Gm6977	0	0.264701	0.287	0.038	0
Map3k2	1.67e-237	0.264861	0.445	0.291	4.88e-233
Dnajc5	1.78e-180	0.265011	0.725	0.652	5.2e-176
Trim35	2.39e-167	0.265026	0.584	0.475	6.98e-163
Crem	2.26e-282	0.265205	0.367	0.189	6.62e-278
Ppp2r1a	2.03e-199	0.265566	0.787	0.703	5.95e-195
Ctnnd1	5.06e-294	0.265743	0.586	0.386	1.48e-289
Snx12	4.43e-204	0.266259	0.536	0.427	1.3e-199
Castor2	0	0.266283	0.324	0.119	0
Trim26	2.6e-279	0.266414	0.439	0.255	7.6e-275
Pitpnm1	0	0.266501	0.326	0.104	0
Rps6ka3	1.09e-203	0.26651	0.548	0.432	3.18e-199
Guca1a	0	0.266801	0.324	0.106	0
Tspan31	2.24e-223	0.266959	0.666	0.53	6.56e-219
Srd5a3	6.71e-230	0.266992	0.447	0.308	1.96e-225
Naip2	0	0.267021	0.365	0.147	0
Cuedc2	2.9e-196	0.267208	0.845	0.788	8.48e-192
0610009B22Rik	9.76e-179	0.267749	0.564	0.487	2.85e-174
Gabarapl2	4.36e-253	0.267955	0.874	0.822	1.27e-248
Gpr107	2.19e-229	0.268032	0.492	0.357	6.41e-225
Ctnna1	2.74e-288	0.268077	0.784	0.625	8.01e-284
Jade2	0	0.268108	0.313	0.103	0
Pam	0	0.268391	0.466	0.227	0
Txndc12	3.62e-246	0.268535	0.491	0.341	1.06e-241
Cuta	8.1e-192	0.268656	0.883	0.781	2.37e-187
Slc29a3	7.53e-246	0.26871	0.394	0.233	2.2e-241
Fosl2	1e-283	0.269105	0.408	0.199	2.92e-279
Slc4a2	1.57e-291	0.269412	0.473	0.278	4.6e-287
Was	2.85e-255	0.26946	0.589	0.408	8.33e-251
Itpr2	0	0.270871	0.344	0.142	0
Itga5	0	0.271019	0.498	0.251	0
Ensa	5.24e-213	0.271235	0.665	0.59	1.53e-208
Ndufa2	3.31e-300	0.271403	0.979	0.937	9.68e-296
Cox5a	7.47e-202	0.271542	0.982	0.906	2.18e-197
Rapsn	0	0.271731	0.277	0.082	0
Senp2	7.23e-170	0.272035	0.699	0.654	2.11e-165
Mkrn1	0	0.272101	0.84	0.698	0
Nfatc2	0	0.272349	0.281	0.033	0
Slc35a5	0	0.272475	0.357	0.157	0
Vps41	4.05e-201	0.272672	0.599	0.5	1.18e-196
Stard3	1.07e-245	0.27269	0.477	0.337	3.14e-241
Cdipt	3.16e-209	0.273221	0.697	0.596	9.23e-205
Atl3	1.93e-191	0.273389	0.589	0.49	5.66e-187
Tbc1d14	7.8e-229	0.27379	0.437	0.301	2.28e-224
Slc25a45	0	0.273961	0.417	0.193	0
Mgrn1	6.18e-259	0.274128	0.484	0.33	1.81e-254
Crebrf	7.65e-216	0.274263	0.399	0.246	2.24e-211
Ier3ip1	6.81e-227	0.274449	0.875	0.774	1.99e-222
Slc38a6	0	0.274775	0.329	0.119	0
Rnf5	3.77e-203	0.275042	0.661	0.596	1.1e-198
Gm43343	0	0.275063	0.295	0.083	0
Gipc1	8.26e-240	0.275204	0.631	0.498	2.42e-235
Alg5	4.52e-202	0.275256	0.652	0.564	1.32e-197
Rin2	0	0.275312	0.315	0.101	0
Acadm	1.7e-211	0.275545	0.655	0.564	4.98e-207
Fam45a	2.89e-265	0.27565	0.426	0.266	8.45e-261
Plxna2	2.49e-271	0.275837	0.347	0.173	7.29e-267
Pilra	0	0.276233	0.263	0.042	0
Vasp	5.23e-172	0.276919	0.756	0.689	1.53e-167
Numa1	2.21e-205	0.277208	0.757	0.7	6.46e-201
Smarcc2	4.81e-196	0.277279	0.646	0.579	1.4e-191
Nr1h2	2.64e-203	0.277429	0.584	0.497	7.73e-199
Cox4i1	0	0.277531	0.992	0.982	0
Rgs19	1.82e-259	0.277565	0.686	0.509	5.33e-255
Rtf2	1.93e-187	0.277609	0.735	0.679	5.63e-183
Ebpl	2.53e-231	0.277657	0.568	0.438	7.4e-227
Itsn1	2.18e-302	0.277735	0.503	0.298	6.36e-298
Irak4	0	0.278092	0.375	0.187	0
Pank3	9.66e-242	0.278495	0.479	0.33	2.82e-237
Uvrag	7.25e-204	0.278532	0.558	0.443	2.12e-199
Stxbp3	9.78e-261	0.279215	0.445	0.292	2.86e-256
Ltbr	1.41e-283	0.279291	0.494	0.309	4.11e-279
Tbc1d23	2.04e-253	0.279442	0.458	0.298	5.97e-249
Lrrc27	0	0.279856	0.304	0.069	0
Anxa7	1.61e-191	0.280706	0.758	0.699	4.71e-187
Wls	0	0.281017	0.708	0.32	0
Sp100	0	0.281323	0.328	0.073	0
Naxe	5.42e-239	0.281474	0.724	0.618	1.58e-234
Ep300	2.79e-192	0.281953	0.683	0.624	8.16e-188
Kitl	0	0.282478	0.307	0.072	0
Ppp2r5c	3.27e-208	0.282859	0.79	0.72	9.55e-204
Ankrd44	4.5e-281	0.283174	0.54	0.339	1.32e-276
Xiap	1.15e-223	0.283344	0.615	0.509	3.35e-219
Actg1	0	0.283402	0.997	0.921	0
Gm26740	0	0.284363	0.321	0.063	0
Tmem65	3.4e-263	0.284394	0.454	0.278	9.93e-259
Fnbp1l	1.07e-268	0.284766	0.434	0.252	3.13e-264
Arsb	0	0.28482	0.401	0.172	0
Gkap1	4.48e-223	0.284934	0.526	0.383	1.31e-218
Map3k11	2.17e-238	0.285248	0.476	0.33	6.34e-234
Pqlc3	0	0.285251	0.373	0.155	0
Bcap31	2.98e-233	0.285252	0.928	0.828	8.71e-229
Dennd1a	4.6e-236	0.285329	0.475	0.334	1.35e-231
Map3k3	1.58e-299	0.285591	0.437	0.255	4.62e-295
Nsf	2.01e-210	0.286139	0.644	0.568	5.87e-206
Gm44667	0	0.286413	0.319	0.104	0
Mvb12a	3.36e-215	0.287207	0.665	0.574	9.83e-211
Clptm1l	4.14e-224	0.287356	0.781	0.689	1.21e-219
Stx3	0	0.287662	0.389	0.144	0
Taok3	3.38e-191	0.287825	0.864	0.806	9.89e-187
Ypel5	0	0.288075	0.573	0.364	0
Snta1	0	0.288128	0.304	0.073	0
Sh3bp1	8.54e-199	0.288321	0.634	0.544	2.5e-194
Trip11	2.29e-194	0.288877	0.669	0.576	6.71e-190
Grina	0	0.289197	0.862	0.61	0
Cln6	6.45e-242	0.289546	0.517	0.389	1.88e-237
Fam213b	0	0.289734	0.362	0.176	0
Pqlc2	0	0.289904	0.361	0.138	0
Pcmtd1	9.85e-274	0.290464	0.536	0.35	2.88e-269
Akr1c13	0	0.290599	0.343	0.084	0
Manba	0	0.291	0.395	0.183	0
D1Ertd622e	4.11e-243	0.291185	0.594	0.449	1.2e-238
Gm45221	1.21e-257	0.291254	0.423	0.253	3.53e-253
Shisa9	0	0.291285	0.252	0.009	0
Plaur	0	0.291638	0.408	0.192	0
Itga9	0	0.291838	0.323	0.09	0
Ccdc50	4.9e-213	0.291871	0.696	0.609	1.43e-208
Tmem134	1.95e-265	0.292097	0.826	0.758	5.71e-261
Inpp4b	0	0.29248	0.327	0.083	0
Slco4a1	0	0.292944	0.273	0.053	0
Vps35	5.13e-226	0.293113	0.877	0.799	1.5e-221
Plekha2	0	0.293631	0.423	0.218	0
Relb	0	0.29446	0.345	0.133	0
Extl3	1.25e-280	0.294664	0.449	0.279	3.65e-276
Vps28	7.25e-233	0.294761	0.796	0.718	2.12e-228
Ifrd1	1.26e-141	0.295188	0.639	0.574	3.69e-137
Smarca2	0	0.295463	0.434	0.228	0
Snap23	6.36e-208	0.295775	0.7	0.614	1.86e-203
Sdf2	3.04e-238	0.295984	0.709	0.607	8.89e-234
Ssu72	5.8e-227	0.296105	0.88	0.766	1.7e-222
Mgat4a	0	0.296275	0.384	0.158	0
Cd86	0	0.296287	0.297	0.055	0
Dlgap4	0	0.296583	0.575	0.355	0
Mospd2	0	0.296587	0.429	0.21	0
Snx1	5.08e-239	0.296645	0.677	0.589	1.48e-234
Mfhas1	0	0.296694	0.391	0.164	0
Wdr45b	2.1e-253	0.297368	0.628	0.507	6.14e-249
BC031181	6.31e-297	0.297779	0.884	0.772	1.85e-292
Nab1	4.64e-281	0.298211	0.584	0.421	1.36e-276
Galns	0	0.298344	0.416	0.212	0
Clcn4	1.21e-228	0.298722	0.574	0.451	3.52e-224
Phyh	0	0.298859	0.431	0.178	0
Txnrd1	2.47e-191	0.299102	0.847	0.776	7.23e-187
Ptp4a2	1.63e-289	0.299154	0.97	0.908	4.75e-285
Pparg	0	0.299614	0.313	0.051	0
Lrrfip1	4.24e-279	0.300038	0.8	0.56	1.24e-274
Cebpd	2.05e-254	0.300692	0.505	0.308	5.99e-250
Vapa	7.87e-262	0.300723	0.928	0.794	2.3e-257
Selplg	0	0.300972	0.576	0.341	0
Ptger4	0	0.301101	0.321	0.139	0
Pikfyve	7.56e-251	0.301164	0.482	0.341	2.21e-246
Rufy1	9.75e-268	0.301695	0.468	0.315	2.85e-263
Fam76a	1.07e-240	0.302291	0.574	0.458	3.12e-236
Ehbp1l1	0	0.302408	0.746	0.613	0
Rnpepl1	8.35e-264	0.302839	0.503	0.361	2.44e-259
Ids	0	0.302913	0.389	0.163	0
Gas7	0	0.303103	0.325	0.109	0
Ndufa13	0	0.303168	0.976	0.939	0
Rnf111	4.86e-281	0.303197	0.58	0.442	1.42e-276
Parp14	0	0.303211	0.332	0.081	0
Pgap1	0	0.303619	0.312	0.058	0
Malt1	1.71e-182	0.30415	0.429	0.295	5.01e-178
Rps6ka1	6.65e-277	0.304259	0.708	0.508	1.94e-272
Rras	0	0.304709	0.531	0.227	0
Dnm2	5.01e-247	0.304731	0.68	0.602	1.46e-242
Chmp2b	3.04e-248	0.304744	0.607	0.483	8.87e-244
Gm37474	0	0.304857	0.474	0.242	0
Unc50	5.96e-256	0.305094	0.749	0.653	1.74e-251
Elk3	0	0.305159	0.62	0.357	0
Sntb2	0	0.305235	0.417	0.164	0
Tbc1d10b	1.19e-223	0.305313	0.613	0.53	3.48e-219
Ndel1	1.96e-233	0.305487	0.609	0.489	5.72e-229
Cpt1a	0	0.305655	0.443	0.257	0
Pcbd2	5.03e-232	0.305705	0.725	0.658	1.47e-227
Pros1	0	0.305766	0.413	0.176	0
Galk2	1.77e-287	0.305939	0.532	0.368	5.17e-283
Asl	8.03e-281	0.306155	0.541	0.387	2.35e-276
Gpr108	2.94e-287	0.306419	0.498	0.345	8.59e-283
Mia2	1.48e-237	0.306985	0.765	0.67	4.32e-233
Abraxas2	6.55e-243	0.307027	0.599	0.494	1.91e-238
Sap30	7.4e-198	0.307278	0.577	0.475	2.16e-193
Tax1bp3	0	0.307292	0.582	0.319	0
Trp53inp2	0	0.307368	0.391	0.134	0
A130071D04Rik	0	0.307388	0.406	0.156	0
Fkbp1b	0	0.30746	0.37	0.119	0
Rgl2	0	0.307486	0.469	0.284	0
Tmem179b	2.35e-253	0.307712	0.669	0.576	6.88e-249
Tpt1	0	0.307981	1	0.999	0
Zdhhc20	2.11e-291	0.308378	0.649	0.459	6.15e-287
Dram1	0	0.308416	0.335	0.079	0
Ssbp4	5.41e-261	0.308759	0.8	0.68	1.58e-256
Fhod1	0	0.308819	0.4	0.165	0
Emc3	2.17e-241	0.309051	0.708	0.621	6.35e-237
Gas2l1	0	0.30943	0.479	0.223	0
Rab11fip5	0	0.309757	0.341	0.105	0
Ccdc88a	3.22e-206	0.30977	0.622	0.51	9.41e-202
Vps35l	2.41e-285	0.309876	0.574	0.442	7.06e-281
Creb5	0	0.309886	0.304	0.065	0
P4ha1	3.01e-301	0.30996	0.6	0.406	8.8e-297
Il21r	0	0.310071	0.391	0.14	0
Cd151	0	0.310083	0.548	0.283	0
Evi2	0	0.310161	0.384	0.122	0
Prkar1a	4.55e-293	0.310359	0.918	0.822	1.33e-288
Rab2a	0	0.310454	0.921	0.785	0
Tsen34	8.03e-291	0.310516	0.595	0.415	2.35e-286
Mthfsl	8.85e-293	0.310909	0.479	0.318	2.59e-288
Gsdmd	0	0.311409	0.418	0.148	0
Gclm	2.13e-189	0.311862	0.906	0.807	6.23e-185
Enc1	0	0.312545	0.394	0.166	0
Commd3	1.3e-269	0.312777	0.852	0.741	3.8e-265
Adap1	0	0.312913	0.494	0.258	0
Pdcd10	3.65e-260	0.313046	0.832	0.752	1.07e-255
Serf2	0	0.313059	0.976	0.925	0
Fam50a	1.18e-260	0.313706	0.722	0.627	3.45e-256
Specc1	0	0.313738	0.752	0.616	0
Dctn3	8.82e-291	0.313851	0.907	0.826	2.58e-286
Pnpla2	3.01e-270	0.314023	0.533	0.393	8.79e-266
Rnf213	4.81e-204	0.314369	0.444	0.306	1.41e-199
Dusp6	1.36e-255	0.314596	0.45	0.255	3.98e-251
Igsf8	4.04e-285	0.314769	0.532	0.378	1.18e-280
Psmb9	0	0.314893	0.53	0.267	0
Selenos	3.08e-301	0.314936	0.842	0.673	9.02e-297
Sft2d2	0	0.314944	0.451	0.265	0
Zfand6	0	0.315265	0.812	0.735	0
R3hdm2	4.16e-276	0.315406	0.631	0.499	1.22e-271
Glb1	7.52e-302	0.315785	0.562	0.407	2.2e-297
Tbc1d9	0	0.315956	0.332	0.076	0
Vapb	9.32e-276	0.316118	0.735	0.623	2.73e-271
Cyp4v3	0	0.316361	0.334	0.046	0
Slc26a11	0	0.316609	0.315	0.051	0
Mfsd5	1.94e-293	0.31667	0.571	0.433	5.68e-289
Mbnl1	4.1e-269	0.31695	0.96	0.873	1.2e-264
Tmem30a	0	0.316997	0.727	0.57	0
Mxd4	5.31e-228	0.317167	0.554	0.39	1.55e-223
Gramd1a	1.6e-297	0.317915	0.496	0.321	4.69e-293
Tspan14	2.09e-300	0.317924	0.591	0.439	6.11e-296
Zfp36l2	5.43e-264	0.31852	0.914	0.774	1.59e-259
Clec5a	0	0.318521	0.407	0.121	0
Osbpl11	3.94e-301	0.318746	0.452	0.283	1.15e-296
Mcee	1.02e-263	0.318923	0.671	0.579	2.98e-259
Madd	0	0.319024	0.482	0.275	0
Dennd1c	0	0.319226	0.366	0.077	0
Casp8	1.06e-262	0.319238	0.623	0.49	3.1e-258
Slc12a6	0	0.319365	0.517	0.342	0
Vipas39	1.73e-304	0.319792	0.475	0.313	5.05e-300
Nipsnap3b	1.55e-284	0.319982	0.646	0.536	4.53e-280
Tpt1-ps3	0	0.320016	0.497	0.264	0
Sdf2l1	4.76e-257	0.320136	0.762	0.639	1.39e-252
Mylip	1.41e-281	0.320323	0.381	0.2	4.13e-277
Ankrd40	7.76e-297	0.321255	0.605	0.473	2.27e-292
Slc31a1	8.7e-264	0.321805	0.59	0.476	2.54e-259
Cbl	5.93e-257	0.322904	0.721	0.61	1.73e-252
Gm6377	0	0.323399	0.267	0.017	0
Mthfs	0	0.323725	0.427	0.208	0
Pias1	1.12e-284	0.323983	0.575	0.444	3.28e-280
Sipa1l2	0	0.324098	0.358	0.101	0
BC037034	2.46e-300	0.324148	0.46	0.287	7.19e-296
Tpcn2	0	0.324661	0.363	0.075	0
Nlrp3	0	0.325562	0.304	0.037	0
Vti1b	0	0.325702	0.76	0.609	0
Dpep2	0	0.326203	0.289	0.02	0
Pdcl3	0	0.32651	0.786	0.629	0
Hps3	0	0.327547	0.458	0.264	0
Anapc11	2.29e-207	0.327561	0.807	0.75	6.7e-203
Cysltr1	0	0.327605	0.34	0.053	0
Eps15	1.69e-250	0.327707	0.661	0.551	4.94e-246
Pik3c2a	0	0.327836	0.48	0.246	0
Tulp4	0	0.3284	0.619	0.256	0
Tubb6	0	0.328536	0.516	0.266	0
Nampt	1.22e-249	0.329039	0.538	0.417	3.55e-245
Vamp8	0	0.329104	0.97	0.918	0
Dok1	0	0.32932	0.545	0.377	0
Haghl	0	0.329565	0.479	0.259	0
Rnf115	0	0.329634	0.606	0.481	0
Cnrip1	0	0.329708	0.408	0.17	0
Tmbim1	0	0.330287	0.555	0.34	0
Rnf166	1.26e-298	0.33031	0.558	0.404	3.69e-294
Casp4	0	0.330382	0.334	0.043	0
Dleu2	0	0.330854	0.629	0.44	0
Hk2	1.55e-208	0.331253	0.545	0.413	4.54e-204
Gm43323	0	0.332215	0.324	0.029	0
Pcyox1	0	0.332473	0.518	0.333	0
Sgsh	0	0.332645	0.36	0.097	0
Ttyh3	0	0.333187	0.608	0.45	0
Klhl24	6.36e-279	0.33346	0.634	0.475	1.86e-274
Oxr1	0	0.333474	0.535	0.358	0
Snapin	0	0.333653	0.555	0.392	0
Mgat5	0	0.333714	0.446	0.233	0
Gm37420	0	0.33374	0.414	0.169	0
Tmem206	0	0.333742	0.418	0.18	0
Ugp2	0	0.334044	0.635	0.461	0
Ndfip2	0	0.334319	0.635	0.445	0
Dnmt3a	0	0.334435	0.637	0.466	0
Bicd2	0	0.335496	0.562	0.366	0
Dhrs1	0	0.336894	0.573	0.409	0
Mien1	0	0.336947	0.837	0.723	0
Prag1	0	0.336979	0.345	0.055	0
Mtln	3.21e-280	0.338373	0.734	0.624	9.38e-276
2610203C22Rik	0	0.338894	0.342	0.045	0
Vps26a	3.2e-280	0.338915	0.665	0.565	9.36e-276
Rilpl2	1.33e-235	0.338948	0.558	0.431	3.88e-231
Tram1	0	0.339013	0.831	0.749	0
Tmem104	0	0.339787	0.386	0.143	0
Anxa2	0	0.340222	0.905	0.34	0
Gm43775	0	0.34061	0.34	0.042	0
Tmcc3	0	0.340677	0.394	0.115	0
2900026A02Rik	0	0.340848	0.395	0.139	0
Slc17a5	0	0.340876	0.405	0.161	0
9930111J21Rik2	0	0.340978	0.413	0.137	0
Hbp1	1.71e-285	0.34099	0.556	0.405	5e-281
Ctso	0	0.340992	0.402	0.121	0
Acer3	1.95e-290	0.341103	0.564	0.43	5.7e-286
Fuca2	9.74e-302	0.341137	0.642	0.512	2.85e-297
Sphk2	0	0.341516	0.477	0.299	0
Igsf6	0	0.341597	0.556	0.179	0
Sfxn5	0	0.341816	0.349	0.058	0
Klf2	1.55e-113	0.342507	0.476	0.358	4.53e-109
Ccdc12	0	0.342563	0.895	0.796	0
St8sia4	0	0.343412	0.505	0.236	0
Clcn7	0	0.343667	0.439	0.224	0
Stx8	0	0.344216	0.666	0.532	0
Aph1a	0	0.344307	0.735	0.611	0
Dusp22	0	0.344597	0.396	0.121	0
Ttc28	0	0.34464	0.538	0.235	0
Tmem120a	0	0.345135	0.503	0.293	0
Pofut2	0	0.345151	0.635	0.453	0
1700017B05Rik	1.2e-294	0.34522	0.61	0.473	3.49e-290
Zfand2a	0	0.345673	0.398	0.157	0
Wbp4	3.44e-299	0.345856	0.812	0.728	1.01e-294
Galnt12	0	0.346242	0.36	0.044	0
Pxk	0	0.346318	0.508	0.302	0
Dbi	0	0.34674	0.975	0.884	0
Lamtor3	2.49e-284	0.346753	0.755	0.663	7.27e-280
Fam234a	0	0.347167	0.418	0.155	0
Plcg2	0	0.347198	0.636	0.353	0
Diaph1	0	0.347218	0.79	0.669	0
Tle1	2.12e-297	0.347445	0.49	0.326	6.19e-293
Creb3	0	0.347681	0.523	0.275	0
Sh3bgrl2	0	0.348112	0.37	0.069	0
Ik	0	0.348195	0.851	0.76	0
Pde3b	0	0.348246	0.478	0.278	0
Cnih4	9.17e-284	0.348643	0.865	0.777	2.68e-279
Dmxl1	8.57e-288	0.348831	0.62	0.5	2.51e-283
Morf4l1	0	0.348943	0.97	0.891	0
Ilk	0	0.348964	0.809	0.665	0
Anpep	0	0.349275	0.258	0.046	0
Nrcam	0	0.349731	0.318	0.027	0
Arhgap12	0	0.350078	0.439	0.213	0
Nek6	0	0.351036	0.493	0.269	0
Hook3	1.51e-294	0.351289	0.697	0.559	4.42e-290
Snx30	0	0.351308	0.505	0.272	0
Ppp1r9b	0	0.351408	0.654	0.527	0
Bmp2	0	0.351459	0.292	0.033	0
Ankrd12	9.07e-273	0.351822	0.622	0.456	2.65e-268
Sfmbt1	0	0.352121	0.498	0.309	0
Pisd	0	0.352514	0.586	0.428	0
Dcxr	0	0.352724	0.572	0.281	0
2510039O18Rik	0	0.353115	0.621	0.475	0
Washc4	0	0.353157	0.552	0.361	0
Myo10	0	0.353819	0.478	0.24	0
Bmt2	0	0.354057	0.488	0.26	0
Epsti1	0	0.354193	0.432	0.127	0
Gm37606	0	0.354256	0.34	0.056	0
Tom1	0	0.355034	0.445	0.195	0
Hsbp1	0	0.35517	0.923	0.772	0
Cers6	0	0.355195	0.492	0.243	0
Agap1	0	0.355246	0.447	0.226	0
Tbk1	0	0.355764	0.573	0.403	0
St6gal1	0	0.355884	0.36	0.065	0
Cnpy3	0	0.3564	0.676	0.519	0
Cmtm6	0	0.356519	0.518	0.329	0
Mef2d	0	0.356821	0.636	0.499	0
Sumf1	0	0.357455	0.494	0.25	0
Tbc1d20	0	0.357496	0.615	0.448	0
Mon2	0	0.357511	0.577	0.399	0
Dok3	0	0.357945	0.441	0.128	0
Slc25a11	0	0.35802	0.79	0.68	0
Ten1	0	0.358358	0.746	0.647	0
Naga	0	0.358519	0.557	0.343	0
Clec4a3	0	0.359238	0.297	0.015	0
Pbxip1	0	0.359614	0.54	0.337	0
Slc35e4	0	0.360478	0.415	0.148	0
Erbin	0	0.36066	0.642	0.477	0
Myh9	0	0.360926	0.935	0.77	0
Exoc3	5.36e-293	0.361772	0.73	0.638	1.57e-288
Mtpn	0	0.36291	0.921	0.809	0
Psme2	0	0.362941	0.857	0.742	0
Rela	0	0.363068	0.644	0.512	0
Aph1c	0	0.363303	0.36	0.053	0
Klf10	0	0.363323	0.441	0.244	0
Rnf149	0	0.36458	0.444	0.189	0
Arf1	0	0.365002	0.972	0.884	0
Rheb	0	0.365262	0.897	0.79	0
Trafd1	0	0.365404	0.512	0.312	0
Cpq	0	0.365626	0.481	0.212	0
Nr3c1	0	0.365681	0.643	0.478	0
Slc23a2	0	0.366306	0.418	0.131	0
2023-03-01	0	0.366321	0.35	0.028	0
Fmnl3	0	0.367074	0.439	0.161	0
Rabep1	0	0.367429	0.635	0.491	0
Ccny	0	0.3678	0.682	0.569	0
Ndufv3	0	0.367928	0.935	0.846	0
Tlr4	0	0.3682	0.374	0.038	0
Mocos	0	0.368911	0.354	0.032	0
Atp6v1h	0	0.369651	0.692	0.54	0
Prkch	0	0.369781	0.41	0.076	0
Psenen	0	0.369787	0.877	0.778	0
Kif1c	0	0.369802	0.503	0.168	0
Esyt1	0	0.370075	0.603	0.442	0
S100a13	0	0.370141	0.858	0.627	0
Nagpa	0	0.370891	0.574	0.381	0
Tmem256	0	0.371425	0.954	0.917	0
Cops9	0	0.371675	0.953	0.856	0
Pdgfa	0	0.371943	0.482	0.147	0
Elovl1	0	0.373918	0.809	0.683	0
Ncoa1	0	0.374113	0.423	0.139	0
Cebpg	0	0.374139	0.612	0.489	0
Gba	0	0.374189	0.519	0.302	0
Dhrs7	0	0.37428	0.529	0.246	0
Cd37	0	0.374543	0.621	0.388	0
Tiparp	7.87e-296	0.374567	0.512	0.338	2.3e-291
Ankfy1	0	0.375198	0.62	0.465	0
Wdfy2	0	0.375356	0.445	0.183	0
Gab2	0	0.375943	0.449	0.202	0
Chmp3	0	0.377823	0.813	0.675	0
Aip	0	0.377869	0.661	0.51	0
Acap2	0	0.378285	0.583	0.38	0
Ahcyl2	0	0.378409	0.547	0.345	0
Atf6	0	0.378469	0.593	0.413	0
Tm9sf3	0	0.378835	0.929	0.793	0
Chd3	0	0.379788	0.57	0.234	0
Rcan1	0	0.380205	0.407	0.228	0
Necap2	0	0.380575	0.839	0.69	0
Pon2	0	0.381133	0.759	0.64	0
Cflar	0	0.381211	0.62	0.415	0
Arhgdib	0	0.381314	0.98	0.735	0
Lamtor5	0	0.381706	0.903	0.801	0
Sypl	0	0.382637	0.78	0.634	0
Mbnl2	0	0.382776	0.775	0.468	0
Rel	0	0.382855	0.525	0.277	0
Itsn2	0	0.382909	0.716	0.593	0
Tanc2	0	0.382998	0.443	0.198	0
Fibp	0	0.383022	0.665	0.521	0
Itprid2	0	0.383437	0.505	0.256	0
Tnrc18	0	0.383503	0.636	0.377	0
Acbd5	0	0.383975	0.614	0.401	0
Washc2	0	0.384021	0.684	0.508	0
Lrpap1	0	0.384068	0.735	0.632	0
Zbtb7b	0	0.384111	0.466	0.172	0
Tmbim4	0	0.385554	0.858	0.717	0
1110008P14Rik	0	0.385657	0.692	0.545	0
Gpr146	0	0.385687	0.475	0.195	0
Wdfy4	0	0.386132	0.529	0.229	0
Otulin	0	0.386172	0.736	0.623	0
Tm2d1	0	0.3864	0.644	0.444	0
Rtp4	0	0.386642	0.285	0.049	0
Eif4g3	0	0.387274	0.767	0.622	0
Gm45640	0	0.388511	0.369	0.037	0
Gnb1	0	0.388771	0.95	0.831	0
Ago3	0	0.389718	0.494	0.248	0
G6pdx	0	0.38994	0.66	0.512	0
Lmna	0	0.390313	0.899	0.62	0
Dync1h1	0	0.390749	0.814	0.679	0
Ctnnb1	0	0.390762	0.893	0.763	0
Trappc6b	0	0.391554	0.78	0.652	0
Aup1	0	0.39333	0.868	0.784	0
Rex1bd	0	0.393462	0.884	0.793	0
Gamt	0	0.394559	0.555	0.247	0
Derl2	0	0.394962	0.663	0.503	0
Serinc3	1.28e-235	0.395296	0.967	0.926	3.73e-231
Vma21	0	0.395482	0.729	0.637	0
Tspan17	0	0.395594	0.467	0.147	0
Rnf128	0	0.395694	0.521	0.211	0
Abcb1b	0	0.395764	0.415	0.086	0
Pik3cg	0	0.39579	0.533	0.256	0
Cytip	0	0.395973	0.405	0.199	0
Rassf3	0	0.396558	0.517	0.269	0
Dennd5a	0	0.396796	0.627	0.422	0
Ctla2b	0	0.39718	0.368	0.024	0
Themis2	0	0.397219	0.428	0.08	0
Samd9l	0	0.397264	0.411	0.089	0
mt-Rnr2	0	0.397499	1	0.999	0
Sem1	0	0.397908	0.988	0.959	0
Cyth1	0	0.398399	0.412	0.113	0
Gm14636	0	0.398492	0.319	0.112	0
Stat3	0	0.398737	0.704	0.542	0
Map3k8	0	0.399135	0.407	0.075	0
Insig1	0	0.399224	0.528	0.333	0
Pitpnc1	5.93e-262	0.399352	0.584	0.455	1.73e-257
Sec11c	0	0.399435	0.908	0.789	0
Tpra1	0	0.399537	0.486	0.219	0
Tsc22d4	0	0.399744	0.901	0.794	0
Sipa1	0	0.399853	0.715	0.545	0
Aftph	0	0.399953	0.64	0.474	0
Sec14l1	0	0.401189	0.577	0.38	0
Cbfb	0	0.401257	0.599	0.405	0
Tnfsf9	0	0.402174	0.309	0.051	0
Ncor2	0	0.402652	0.622	0.414	0
Zeb2os	0	0.402737	0.465	0.153	0
Tmem192	0	0.403411	0.605	0.405	0
Gas2l3	0	0.40342	0.478	0.233	0
Ubtd1	0	0.403962	0.521	0.23	0
Cept1	0	0.404101	0.56	0.354	0
Plekhm1	0	0.404693	0.448	0.179	0
B3gnt8	0	0.404794	0.433	0.082	0
Pip4k2a	0	0.404833	0.74	0.58	0
Ptafr	0	0.405118	0.379	0.04	0
Ggta1	0	0.405801	0.557	0.322	0
Ptpro	0	0.406125	0.386	0.022	0
Map4k3	0	0.407216	0.453	0.145	0
Gdpd5	0	0.407334	0.402	0.05	0
Fam49b	0	0.407761	0.894	0.73	0
Mir22hg	0	0.408764	0.466	0.169	0
Wdr91	0	0.408902	0.501	0.229	0
Scand1	0	0.409142	0.944	0.844	0
Spg21	0	0.40965	0.725	0.556	0
Amdhd2	0	0.41	0.615	0.446	0
Zfp263	0	0.410555	0.506	0.296	0
Nectin3	0	0.411345	0.437	0.156	0
Akr1b10	0	0.412183	0.563	0.301	0
Commd10	0	0.412213	0.537	0.3	0
Prkcb	0	0.412507	0.421	0.075	0
Furin	0	0.412703	0.599	0.316	0
Srp14	0	0.413424	0.959	0.861	0
Antxr2	0	0.414564	0.467	0.156	0
Osbpl9	0	0.415058	0.645	0.439	0
Sel1l	0	0.415525	0.683	0.488	0
Hsd17b12	0	0.415617	0.812	0.641	0
Edil3	0	0.415758	0.393	0.052	0
Fcho2	0	0.415787	0.662	0.472	0
Tmem38b	0	0.415887	0.511	0.238	0
Slc15a4	0	0.416366	0.518	0.274	0
Arhgef6	0	0.416756	0.605	0.29	0
Foxn3	0	0.417239	0.713	0.529	0
Tmem243	0	0.41737	0.486	0.171	0
Lgals8	0	0.417864	0.546	0.291	0
Gm8995	0	0.418514	0.596	0.271	0
Hdac5	0	0.418786	0.515	0.234	0
Cbr3	0	0.418864	0.425	0.091	0
H2-M3	0	0.419726	0.414	0.064	0
Degs1	0	0.420318	0.852	0.603	0
Arpc4	0	0.420679	0.957	0.85	0
Ripk1	0	0.42081	0.638	0.472	0
Stard8	0	0.42093	0.429	0.068	0
Cyb5r1	0	0.421099	0.638	0.42	0
Txndc17	0	0.421149	0.954	0.839	0
Tmem87b	0	0.421581	0.502	0.248	0
Diaph2	0	0.421867	0.507	0.222	0
Nacc2	0	0.422613	0.459	0.131	0
Ubl5	0	0.422627	0.979	0.93	0
Hlx	0	0.4228	0.432	0.094	0
Hcfc1r1	0	0.423788	0.791	0.512	0
Dusp7	0	0.424416	0.563	0.367	0
Aldoa	0	0.424463	0.986	0.903	0
Camta2	0	0.42478	0.479	0.166	0
Fnip1	0	0.425007	0.609	0.391	0
Il10ra	0	0.425218	0.408	0.045	0
Gak	0	0.426988	0.676	0.518	0
Vav3	0	0.427208	0.549	0.24	0
Emc7	0	0.427237	0.876	0.747	0
Pnp	0	0.427313	0.889	0.806	0
Cd200r1	0	0.427346	0.468	0.138	0
Col18a1	0	0.427816	0.445	0.139	0
Tec	0	0.427817	0.48	0.152	0
Ier3	1.33e-118	0.428389	0.558	0.458	3.88e-114
Slc31a2	0	0.429237	0.496	0.172	0
Xbp1	0	0.429559	0.732	0.561	0
Scamp5	0	0.43029	0.454	0.105	0
Dok2	0	0.430299	0.571	0.269	0
Nek7	0	0.430327	0.708	0.47	0
Slfn5	0	0.431373	0.309	0.03	0
Mafg	0	0.431618	0.802	0.677	0
Emp1	0	0.431915	0.658	0.149	0
Ppp1r12c	0	0.432369	0.685	0.511	0
Ms4a14	0	0.432408	0.369	0.009	0
Gnb2	0	0.432583	0.975	0.912	0
Clip1	0	0.433305	0.659	0.482	0
Cklf	0	0.433691	0.592	0.379	0
Lilrb4a	0	0.434724	0.412	0.032	0
Pacsin2	0	0.436288	0.731	0.597	0
Tm9sf2	0	0.436363	0.814	0.644	0
Abcc1	0	0.436455	0.631	0.414	0
Serp1	0	0.436465	0.909	0.8	0
Sin3b	0	0.436606	0.868	0.742	0
Tgfb1	0	0.436811	0.941	0.765	0
Rap1gds1	0	0.437224	0.642	0.443	0
Ube2q1	0	0.437619	0.814	0.662	0
Rtn4rl1	0	0.437905	0.407	0.028	0
Ly96	0	0.437906	0.478	0.138	0
Lnpep	0	0.438078	0.733	0.538	0
Rab5b	0	0.438469	0.609	0.356	0
Triap1	0	0.438925	0.727	0.571	0
Vps18	0	0.439489	0.542	0.259	0
Sh3kbp1	0	0.439838	0.792	0.494	0
Leprotl1	0	0.440278	0.739	0.54	0
Epn1	0	0.440722	0.871	0.759	0
Map2k1	0	0.440961	0.703	0.511	0
Ccdc71l	0	0.441046	0.672	0.485	0
Adssl1	0	0.442246	0.544	0.257	0
Pwwp2b	0	0.442693	0.478	0.148	0
Tmem160	0	0.442699	0.904	0.775	0
Pold4	0	0.443748	0.701	0.481	0
Samhd1	0	0.443954	0.714	0.549	0
Gm44250	0	0.444675	0.469	0.105	0
Tmem219	0	0.444866	0.599	0.368	0
Klc4	0	0.44503	0.487	0.177	0
Itpripl2	0	0.445173	0.734	0.274	0
Ap3d1	0	0.445602	0.71	0.54	0
Hyi	0	0.446206	0.584	0.331	0
Colgalt1	0	0.446401	0.813	0.649	0
Trappc3	0	0.446844	0.783	0.626	0
Pura	0	0.4474	0.737	0.523	0
Mertk	0	0.4479	0.401	0.043	0
Nmt1	0	0.448496	0.876	0.764	0
Cmip	0	0.449108	0.67	0.47	0
Commd8	0	0.44922	0.767	0.628	0
Kif3a	0	0.449435	0.509	0.348	0
Itgal	0	0.44989	0.491	0.249	0
Ykt6	0	0.450051	0.686	0.522	0
Ncstn	0	0.450056	0.682	0.442	0
Zbtb20	0	0.450749	0.512	0.224	0
Plekhm3	0	0.450933	0.473	0.132	0
Sesn1	0	0.451165	0.552	0.293	0
Chmp2a	0	0.451495	0.919	0.842	0
Fat3	0	0.452131	0.398	0.013	0
Il6ra	0	0.452317	0.512	0.178	0
Oxct1	0	0.452452	0.777	0.615	0
Ltc4s	0	0.453002	0.379	0.055	0
Iscu	0	0.453845	0.882	0.775	0
Gsk3b	0	0.454417	0.87	0.742	0
H2-T23	0	0.454851	0.558	0.268	0
Mroh1	0	0.45488	0.549	0.238	0
Ubash3b	0	0.455057	0.609	0.292	0
Brox	0	0.455194	0.592	0.325	0
Etv5	0	0.455789	0.453	0.127	0
Dmpk	0	0.455793	0.396	0.088	0
Vps4b	0	0.45643	0.732	0.553	0
Bhlhe41	0	0.457073	0.398	0.066	0
Atxn1	0	0.457108	0.554	0.266	0
Nfkbid	0	0.457475	0.466	0.134	0
Cpeb2	0	0.458041	0.477	0.166	0
Synj1	0	0.458118	0.627	0.391	0
Rftn1	0	0.458611	0.54	0.285	0
Lacc1	0	0.45885	0.481	0.154	0
Arf3	0	0.459015	0.739	0.504	0
Sbno2	0	0.45915	0.609	0.365	0
Fcgr4	0	0.460728	0.401	0.04	0
Mfsd12	0	0.460919	0.521	0.244	0
Pla2g7	0	0.461059	0.401	0.12	0
Mob1a	0	0.461142	0.809	0.673	0
Prdx4	0	0.461434	0.786	0.686	0
0610012G03Rik	0	0.46154	0.925	0.794	0
Lrp10	0	0.461742	0.733	0.525	0
Tmem140	0	0.462778	0.417	0.044	0
Mtmr6	0	0.462895	0.57	0.28	0
Tex261	0	0.46296	0.859	0.713	0
Rab1b	0	0.463488	0.806	0.653	0
Flii	0	0.463619	0.73	0.549	0
Prkacb	0	0.463979	0.652	0.435	0
BC028528	0	0.464675	0.565	0.226	0
Secisbp2l	0	0.464748	0.611	0.289	0
Spcs1	0	0.464975	0.942	0.825	0
Ntpcr	0	0.465463	0.645	0.472	0
Bin2	0	0.46594	0.767	0.455	0
Arhgef7	0	0.467328	0.584	0.34	0
Leprot	0	0.467417	0.762	0.556	0
Luzp1	0	0.467462	0.653	0.334	0
Axl	0	0.468096	0.641	0.163	0
Akirin1	0	0.469447	0.761	0.623	0
Tmem9b	0	0.469693	0.651	0.412	0
Srxn1	0	0.469901	0.578	0.249	0
Rpl35	0	0.469918	0.986	0.923	0
Rtn3	0	0.470499	0.93	0.824	0
Man2a1	0	0.470908	0.678	0.386	0
Ubald1	0	0.472557	0.648	0.419	0
Jak1	0	0.473747	0.869	0.723	0
Wbp2	0	0.474866	0.775	0.612	0
Tnfaip3	0	0.475513	0.471	0.169	0
Fgd2	0	0.475806	0.51	0.118	0
Pde8a	0	0.476309	0.474	0.086	0
Pip5k1c	0	0.476865	0.626	0.377	0
Krcc1	0	0.477032	0.796	0.602	0
Arhgap10	0	0.477253	0.626	0.392	0
Fam168b	0	0.477871	0.728	0.542	0
Snx5	0	0.477962	0.95	0.802	0
Med15	0	0.478785	0.712	0.521	0
Rab8b	0	0.479066	0.735	0.543	0
Nipa2	0	0.479817	0.768	0.602	0
Pstpip1	0	0.479894	0.656	0.304	0
Gm20559	0	0.480825	0.45	0.044	0
Tubb2a	0	0.480972	0.689	0.45	0
Pon3	0	0.481585	0.51	0.148	0
Aes	0	0.481741	0.97	0.857	0
Ppp3ca	0	0.481878	0.868	0.647	0
Fam129b	0	0.482442	0.63	0.241	0
Esd	0	0.482836	0.971	0.909	0
Abi3	0	0.483661	0.501	0.114	0
Hivep3	0	0.483937	0.471	0.093	0
Slc6a8	0	0.483957	0.487	0.142	0
Atp6v1d	0	0.484753	0.818	0.673	0
Pald1	0	0.485943	0.452	0.046	0
Hcst	0	0.487055	0.554	0.181	0
Slco2b1	0	0.4875	0.381	0.015	0
Ccdc152	0	0.487599	0.348	0.027	0
Dpp7	0	0.487644	0.542	0.209	0
Tcf7l2	0	0.487853	0.626	0.348	0
Sqor	0	0.487882	0.504	0.096	0
Adam9	0	0.488257	0.707	0.21	0
Sh2b3	0	0.488285	0.64	0.368	0
Acox3	0	0.488362	0.54	0.201	0
Dtnbp1	0	0.488751	0.783	0.608	0
Plekhm2	0	0.488805	0.538	0.228	0
Rbpj	0	0.4889	0.673	0.489	0
Vps29	0	0.489302	0.921	0.794	0
Rab1a	0	0.489633	0.895	0.747	0
Ppt2	0	0.489742	0.589	0.33	0
Tfe3	0	0.489824	0.588	0.301	0
Clptm1	0	0.490047	0.79	0.621	0
Hprt	0	0.490565	0.937	0.842	0
Pkn1	0	0.490986	0.724	0.503	0
Prdm1	0	0.492237	0.39	0.026	0
Emp2	0	0.492388	0.407	0.14	0
Kif13b	0	0.492559	0.532	0.213	0
Got1	0	0.49287	0.684	0.503	0
Chmp4b	0	0.49316	0.926	0.822	0
Acaa1a	0	0.493459	0.75	0.549	0
Cab39	0	0.493863	0.823	0.673	0
Chmp5	0	0.494062	0.852	0.675	0
Kif5b	0	0.49431	0.956	0.854	0
Gm48582	0	0.495875	0.464	0.105	0
Stx12	0	0.495922	0.671	0.397	0
Rit1	0	0.496288	0.643	0.334	0
Pepd	0	0.49631	0.7	0.471	0
Bmyc	0	0.496419	0.71	0.474	0
Tbcb	0	0.496661	0.884	0.738	0
Cic	0	0.497928	0.69	0.466	0
Ahnak	0	0.498153	0.871	0.221	0
Arhgap25	0	0.498503	0.518	0.147	0
Aldh3b1	0	0.498599	0.491	0.058	0
Trim47	0	0.499136	0.482	0.087	0
Idh1	0	0.499158	0.653	0.37	0
Mef2c	0	0.4998	0.897	0.51	0
Pnpla7	0	0.502057	0.555	0.263	0
Tgm2	0	0.502261	0.547	0.271	0
Spag9	0	0.502514	0.807	0.603	0
Rrbp1	0	0.503677	0.967	0.792	0
Snx17	0	0.50473	0.81	0.665	0
Zswim6	0	0.504776	0.538	0.181	0
Pkib	0	0.504836	0.473	0.118	0
Coro1a	0	0.505916	0.969	0.541	0
Rab20	0	0.506532	0.436	0.065	0
Fkbp15	0	0.506925	0.637	0.384	0
Arl6ip5	0	0.507709	0.804	0.626	0
Swap70	0	0.508142	0.678	0.455	0
Sdf4	0	0.509418	0.891	0.759	0
Celf2	0	0.50949	0.904	0.549	0
Palld	0	0.509508	0.752	0.206	0
Stat6	0	0.510021	0.619	0.34	0
Rhoa	0	0.510439	0.982	0.93	0
Stard9	0	0.512731	0.487	0.071	0
Selenom	0	0.513781	0.793	0.266	0
Myo9b	0	0.51445	0.703	0.462	0
Trappc2l	0	0.514458	0.855	0.698	0
Trim8	0	0.515474	0.684	0.43	0
Plp2	0	0.515477	0.565	0.313	0
Ctnnbip1	0	0.516865	0.638	0.336	0
Usf2	0	0.517089	0.857	0.719	0
Il7r	0	0.517411	0.379	0.047	0
Dgkz	0	0.517756	0.779	0.598	0
Bnip2	0	0.518037	0.896	0.748	0
Sft2d1	0	0.518348	0.711	0.5	0
Napg	0	0.520522	0.668	0.433	0
Snx24	0	0.520545	0.541	0.139	0
Tmem171	0	0.521675	0.458	0.021	0
Jmjd1c	0	0.521981	0.83	0.663	0
Sptlc2	0	0.522389	0.713	0.464	0
2510009E07Rik	0	0.522983	0.481	0.069	0
Smdt1	0	0.523293	0.972	0.929	0
Pak2	0	0.523481	0.897	0.734	0
Pmepa1	0	0.524008	0.633	0.149	0
Icam1	0	0.52408	0.506	0.19	0
Irf1	0	0.525713	0.473	0.115	0
Myof	0	0.526388	0.692	0.155	0
Pi4k2a	0	0.527038	0.651	0.381	0
Cav2	0	0.52765	0.532	0.112	0
B3galnt1	0	0.528339	0.495	0.069	0
Twf2	0	0.529435	0.812	0.524	0
Mpp1	0	0.529902	0.841	0.614	0
Rsrp1	0	0.530536	0.886	0.782	0
Csf2ra	0	0.531278	0.593	0.311	0
Serinc1	0	0.531754	0.896	0.673	0
Plxnc1	0	0.532583	0.589	0.25	0
Pdlim5	0	0.532769	0.691	0.335	0
AI413582	0	0.533593	0.667	0.378	0
Scpep1	0	0.534227	0.718	0.229	0
Hk3	0	0.536071	0.497	0.076	0
Lmbrd1	0	0.536437	0.625	0.299	0
Fermt3	0	0.53672	0.942	0.702	0
Reep3	0	0.537356	0.772	0.46	0
Mpc1	0	0.537758	0.89	0.773	0
Bcl10	0	0.538466	0.754	0.533	0
Dgkd	0	0.538697	0.675	0.407	0
Os9	0	0.539435	0.789	0.603	0
Cox7a2l	0	0.54013	0.971	0.878	0
Arl6ip1	0	0.541047	0.97	0.89	0
Ubb	0	0.541241	0.965	0.911	0
Mdh1	0	0.541536	0.939	0.809	0
Akr1b3	0	0.541858	0.905	0.721	0
Tex264	0	0.54196	0.68	0.352	0
Bbx	0	0.542362	0.708	0.471	0
Irf2bpl	0	0.542489	0.577	0.177	0
Peak1	0	0.544306	0.75	0.385	0
Bach1	0	0.544452	0.711	0.492	0
Znfx1	0	0.544597	0.554	0.187	0
Ppm1h	0	0.544674	0.56	0.151	0
R3hdm1	0	0.545451	0.868	0.778	0
Gnpda1	0	0.546401	0.636	0.36	0
Mitf	0	0.546826	0.494	0.062	0
Tmed10	0	0.547842	0.969	0.861	0
Fblim1	0	0.548723	0.549	0.12	0
Arhgap22	0	0.548744	0.479	0.055	0
Rac1	0	0.548832	0.972	0.884	0
Tpm3	0	0.548975	0.974	0.869	0
Trim30a	0	0.549565	0.544	0.134	0
Pik3r5	0	0.549851	0.5	0.053	0
Frmd4b	0	0.550454	0.528	0.083	0
Cdc42se2	0	0.550784	0.707	0.442	0
Hip1	0	0.551313	0.562	0.181	0
Tmem273	0	0.551667	0.48	0.05	0
Filip1l	0	0.552218	0.652	0.2	0
Selenof	0	0.552861	0.974	0.886	0
Pdcd6ip	0	0.554196	0.898	0.75	0
Flna	0	0.555148	0.915	0.595	0
Gm47586	0	0.556329	0.495	0.14	0
Gm2a	0	0.55672	0.719	0.349	0
Tmf1	0	0.556846	0.77	0.547	0
Ulk2	0	0.557245	0.579	0.213	0
Lamtor4	0	0.557291	0.94	0.785	0
Entpd1	0	0.557327	0.481	0.045	0
Rapgef5	0	0.558042	0.504	0.082	0
Aplp2	0	0.558962	0.901	0.706	0
Gm10076	0	0.559456	0.903	0.656	0
Rufy3	0	0.560298	0.588	0.234	0
Rassf2	0	0.560431	0.584	0.176	0
Irf2	0	0.560671	0.745	0.51	0
Ifnar1	0	0.562553	0.662	0.356	0
Sh3bp2	0	0.562615	0.54	0.102	0
Ralb	0	0.562903	0.741	0.423	0
Rnf19b	0	0.563161	0.612	0.328	0
Slc8a1	0	0.563452	0.521	0.084	0
Arap3	0	0.564504	0.654	0.284	0
Tgoln1	0	0.564806	0.77	0.481	0
Snapc5	0	0.56567	0.808	0.615	0
Nfkb1	0	0.566277	0.766	0.523	0
Gng5	0	0.566437	0.992	0.958	0
Coro1c	0	0.567749	0.827	0.64	0
Atraid	0	0.568064	0.783	0.54	0
Orai1	0	0.568182	0.743	0.445	0
Gatm	0	0.569857	0.502	0.152	0
Ski	0	0.569992	0.68	0.323	0
Use1	0	0.570272	0.908	0.764	0
Dync1i2	0	0.571323	0.917	0.767	0
Rala	0	0.571801	0.846	0.577	0
Dock10	0	0.572444	0.725	0.314	0
Slc44a1	0	0.572484	0.558	0.131	0
Arl8b	0	0.573859	0.816	0.653	0
Snx18	0	0.574443	0.678	0.384	0
Snx3	0	0.574839	0.97	0.908	0
Gm37033	0	0.575103	0.502	0.13	0
Cd300ld	0	0.575238	0.457	0.019	0
Rnase4	0	0.575278	0.495	0.17	0
Arhgef2	0	0.577064	0.772	0.496	0
Evl	0	0.577193	0.698	0.383	0
Arhgap45	0	0.577259	0.732	0.393	0
Spsb2	0	0.577841	0.593	0.214	0
Adipor1	0	0.578132	0.904	0.776	0
Pycard	0	0.57879	0.882	0.609	0
Cd28	0	0.580273	0.452	0.036	0
Lasp1	0	0.580627	0.802	0.426	0
Tnfsf12	0	0.580903	0.521	0.133	0
Kcnk13	0	0.581662	0.531	0.019	0
Gas6	0	0.582121	0.336	0.115	0
Atp1b3	0	0.58363	0.902	0.764	0
Fli1	0	0.584971	0.777	0.387	0
Cmpk1	0	0.585281	0.922	0.801	0
Hsd17b11	0	0.586204	0.654	0.285	0
Ccl6	0	0.586375	0.478	0.047	0
Slc40a1	0	0.58672	0.482	0.252	0
Fmnl1	0	0.587035	0.691	0.276	0
Prr13	0	0.587501	0.893	0.716	0
Agpat3	0	0.587552	0.632	0.203	0
Rnasel	0	0.587899	0.606	0.275	0
Trf	0	0.589811	0.901	0.321	0
Ophn1	0	0.590623	0.529	0.081	0
Sh3bgrl	0	0.591212	0.93	0.741	0
Tmem109	0	0.591375	0.64	0.33	0
Fnip2	0	0.591634	0.542	0.297	0
Tab2	0	0.59239	0.879	0.733	0
Cpne8	0	0.592521	0.523	0.074	0
Tifa	0	0.592693	0.606	0.205	0
Bcl6	0	0.593474	0.511	0.064	0
Dram2	0	0.594024	0.647	0.285	0
Man1c1	0	0.594329	0.579	0.158	0
Usp8	0	0.594546	0.774	0.538	0
Trps1	0	0.594821	0.624	0.226	0
Pip4p1	0	0.595643	0.706	0.382	0
Calm2	0	0.595993	0.98	0.906	0
Rap1b	0	0.596241	0.97	0.818	0
Tlr7	0	0.596259	0.51	0.028	0
Sppl2a	0	0.59698	0.786	0.56	0
Camk1d	0	0.598584	0.558	0.127	0
Runx1	0	0.598653	0.894	0.646	0
Ets2	0	0.600446	0.59	0.255	0
Fes	0	0.60195	0.716	0.276	0
Tesk1	0	0.604816	0.648	0.262	0
Arhgap19	0	0.604817	0.679	0.429	0
Scp2	0	0.605083	0.847	0.638	0
Zfhx3	0	0.605198	0.754	0.295	0
Bax	0	0.606354	0.96	0.833	0
Slc39a1	0	0.607034	0.688	0.364	0
Ap2m1	0	0.607053	0.943	0.865	0
Clec4a1	0	0.607868	0.432	0.026	0
Cln3	0	0.608358	0.62	0.204	0
Tnfrsf1b	0	0.609891	0.568	0.139	0
Clec4n	0	0.61011	0.339	0.019	0
Apobr	0	0.610437	0.578	0.105	0
Il4ra	0	0.611528	0.589	0.213	0
Speg	0	0.612442	0.537	0.112	0
Rasa4	0	0.616791	0.577	0.131	0
Lfng	0	0.617686	0.57	0.139	0
Trib1	0	0.617711	0.6	0.209	0
Dock8	0	0.620614	0.751	0.407	0
Cenpb	0	0.621454	0.841	0.619	0
Dse	0	0.621914	0.605	0.141	0
Ssh2	0	0.622163	0.668	0.425	0
Scamp2	0	0.62217	0.792	0.531	0
Arhgap17	0	0.623127	0.781	0.539	0
Pdxk	0	0.623233	0.654	0.348	0
Dazap2	0	0.624182	0.948	0.821	0
Wipf1	0	0.625395	0.696	0.351	0
Klf13	0	0.625528	0.814	0.596	0
Rasgrp3	0	0.625761	0.527	0.055	0
Slc9a9	0	0.626194	0.54	0.063	0
Plbd2	0	0.626485	0.722	0.399	0
Sh3bp5	0	0.628584	0.645	0.244	0
Msmo1	0	0.6295	0.712	0.384	0
Psen2	0	0.6302	0.746	0.499	0
Cerk	0	0.630302	0.621	0.209	0
Tmem205	0	0.63077	0.763	0.428	0
Snx8	0	0.631766	0.634	0.225	0
Elmo1	0	0.633452	0.758	0.342	0
Cmtm3	0	0.634482	0.707	0.284	0
Neu1	0	0.637276	0.682	0.316	0
Prdx5	0	0.637979	0.962	0.789	0
Adam17	0	0.638181	0.729	0.446	0
S1pr2	0	0.638365	0.594	0.159	0
Pfdn5	0	0.639289	0.981	0.903	0
Pcdh7	0	0.639898	0.579	0.302	0
Wasf2	0	0.643466	0.904	0.757	0
Brk1	0	0.644147	0.966	0.849	0
Syk	0	0.645212	0.743	0.336	0
Cacna1a	0	0.645723	0.534	0.195	0
Rps29	0	0.646234	0.998	0.992	0
Cers2	0	0.646682	0.903	0.721	0
Ncoa3	0	0.647343	0.69	0.304	0
Lamtor2	0	0.647548	0.961	0.833	0
Naglu	0	0.64921	0.591	0.13	0
H3f3b	0	0.649452	0.997	0.971	0
Tecpr1	0	0.650429	0.564	0.177	0
Atp13a2	0	0.651052	0.8	0.498	0
Rpl10	0	0.653983	0.993	0.95	0
Stx4a	0	0.654053	0.788	0.511	0
Gmip	0	0.654614	0.671	0.239	0
Ms4a6b	0	0.654865	0.508	0.089	0
Stard3nl	0	0.654973	0.747	0.375	0
Zdhhc14	0	0.655235	0.612	0.193	0
Psmb8	0	0.659679	0.881	0.4	0
Prex1	0	0.661488	0.709	0.3	0
Trpv2	0	0.661663	0.633	0.183	0
Bin1	0	0.662661	0.764	0.428	0
Sema4d	0	0.663385	0.67	0.289	0
Nagk	0	0.664318	0.676	0.241	0
Snx20	0	0.66461	0.66	0.172	0
Adcy7	0	0.665595	0.787	0.513	0
Daglb	0	0.666594	0.67	0.285	0
Abi1	0	0.667785	0.809	0.525	0
Sirt2	0	0.668066	0.776	0.49	0
Hmox2	0	0.669982	0.837	0.61	0
Cd300lb	0	0.673494	0.568	0.04	0
Wnk1	0	0.673913	0.962	0.884	0
Rab7	0	0.673925	0.942	0.777	0
Ifnar2	0	0.674208	0.816	0.541	0
Tln1	0	0.674991	0.969	0.87	0
Fnbp1	0	0.676751	0.786	0.468	0
Lcp2	0	0.678027	0.651	0.164	0
Nfic	0	0.68084	0.711	0.28	0
Bcl2l11	0	0.681556	0.632	0.24	0
Syngr2	0	0.682403	0.882	0.649	0
Nxpe5	0	0.682579	0.502	0.017	0
Ap1b1	0	0.683675	0.798	0.561	0
Tep1	0	0.68472	0.642	0.149	0
Dock2	0	0.684829	0.786	0.365	0
Tmem8	0	0.685231	0.589	0.079	0
Arap1	0	0.685531	0.687	0.263	0
Cd81	0	0.685568	0.97	0.781	0
S1pr1	0	0.686614	0.609	0.138	0
Tgif1	0	0.686877	0.694	0.295	0
Casp1	0	0.687065	0.615	0.078	0
Ndfip1	0	0.688623	0.906	0.649	0
Wdfy3	0	0.689064	0.706	0.332	0
Atp6v1c1	0	0.689972	0.813	0.576	0
2610001J05Rik	0	0.690034	0.855	0.622	0
Glrx	0	0.691559	0.738	0.428	0
Ptprj	0	0.691934	0.643	0.193	0
Map7d1	0	0.692851	0.789	0.397	0
Smim14	0	0.693385	0.839	0.425	0
Cltc	0	0.694441	0.965	0.869	0
Cln8	0	0.695042	0.712	0.322	0
Folr2	0	0.695626	0.258	0.012	0
Abca1	0	0.695671	0.533	0.123	0
Plekhb2	0	0.696781	0.724	0.268	0
Arl8a	0	0.699467	0.799	0.348	0
Asph	0	0.702041	0.744	0.475	0
Sqstm1	0	0.702708	0.83	0.552	0
Inppl1	0	0.708266	0.656	0.152	0
Wdr1	0	0.708682	0.924	0.707	0
Dnase2a	0	0.708849	0.733	0.36	0
Tnfrsf1a	0	0.709187	0.789	0.368	0
Twf1	0	0.709211	0.81	0.504	0
Edem1	0	0.709828	0.776	0.424	0
Tlr2	0	0.710213	0.551	0.089	0
Zbtb4	0	0.710221	0.627	0.136	0
Lpar6	0	0.712702	0.649	0.184	0
Tmem59	0	0.714228	0.957	0.801	0
Man1a	0	0.715389	0.738	0.355	0
Vav1	0	0.715422	0.771	0.322	0
Mvp	0	0.715864	0.696	0.259	0
Arhgap31	0	0.716313	0.665	0.178	0
St3gal5	0	0.716809	0.863	0.66	0
Rab31	0	0.717793	0.703	0.239	0
Tbxas1	0	0.717948	0.597	0.056	0
Fkbp2	0	0.718374	0.911	0.755	0
Myl6	0	0.718542	0.993	0.964	0
Cdk18	0	0.719404	0.608	0.139	0
Cebpa	0	0.719518	0.614	0.205	0
Rbms1	0	0.719998	0.908	0.519	0
Lpin2	0	0.720945	0.8	0.564	0
Clic4	0	0.72123	0.895	0.735	0
Tmbim6	0	0.722149	0.964	0.841	0
Susd3	0	0.722224	0.606	0.105	0
mt-Nd3	0	0.724187	0.922	0.678	0
Ninj1	0	0.724745	0.744	0.529	0
Pfn1	0	0.727532	0.993	0.957	0
Tspan4	0	0.728234	0.851	0.566	0
Slc27a1	0	0.729368	0.591	0.116	0
Arhgap18	0	0.730567	0.718	0.279	0
Eid1	0	0.730853	0.932	0.792	0
Mir99ahg	0	0.730885	0.597	0.1	0
Cyb5a	0	0.731251	0.964	0.887	0
Kctd12	0	0.73154	0.718	0.363	0
Ap1s2	0	0.732144	0.733	0.225	0
Sbf2	0	0.732702	0.649	0.14	0
Gadd45b	0	0.732835	0.541	0.192	0
Capzb	0	0.733398	0.979	0.841	0
Fam129a	0	0.73463	0.625	0.152	0
Plekho2	0	0.736485	0.765	0.442	0
Galc	0	0.737247	0.666	0.175	0
Mfsd6	0	0.737368	0.642	0.119	0
Rab11a	0	0.738686	0.912	0.735	0
Gla	0	0.739361	0.679	0.276	0
Ddrgk1	0	0.740258	0.884	0.682	0
Srgap2	0	0.740547	0.741	0.349	0
Picalm	0	0.740779	0.948	0.796	0
Sh3pxd2b	0	0.741068	0.685	0.184	0
Hpcal1	0	0.741198	0.788	0.37	0
Atp6v0d1	0	0.741234	0.908	0.701	0
Ldlrap1	0	0.741918	0.758	0.456	0
Gm45223	0	0.743254	0.696	0.32	0
Cd302	0	0.744554	0.74	0.246	0
Vat1	0	0.745967	0.77	0.338	0
Pgd	0	0.747287	0.949	0.771	0
Nav2	0	0.747775	0.609	0.114	0
Ypel3	0	0.747779	0.789	0.386	0
Susd6	0	0.749897	0.769	0.359	0
Dtx4	0	0.750363	0.609	0.092	0
Mapk3	0	0.752641	0.84	0.517	0
Stk17b	0	0.753101	0.796	0.471	0
Glg1	0	0.753213	0.859	0.587	0
Zmiz1	0	0.75337	0.853	0.531	0
Actr2	0	0.753545	0.958	0.812	0
Apbb2	0	0.754254	0.697	0.147	0
Ggh	0	0.756618	0.792	0.387	0
Mfsd11	0	0.757759	0.694	0.217	0
Cpd	0	0.758302	0.794	0.495	0
Ly86	0	0.759688	0.385	0.097	0
Acp2	0	0.760182	0.691	0.217	0
Ncf4	0	0.760601	0.81	0.29	0
Gna13	0	0.760687	0.835	0.569	0
Slc35f6	0	0.761343	0.686	0.183	0
Zfand5	0	0.765424	0.933	0.793	0
Selenok	0	0.769925	0.961	0.842	0
Saraf	0	0.770151	0.872	0.593	0
AB124611	0	0.771198	0.648	0.071	0
Spred1	0	0.771625	0.768	0.389	0
Atp6ap2	0	0.772615	0.886	0.616	0
Cfl1	0	0.773144	0.992	0.957	0
Cux1	0	0.774334	0.906	0.657	0
Msn	0	0.774889	0.974	0.814	0
Gnaq	0	0.775538	0.813	0.395	0
Nav1	0	0.778376	0.724	0.23	0
Tor1aip1	0	0.77919	0.862	0.597	0
Abr	0	0.779624	0.705	0.214	0
Dpysl2	0	0.779903	0.747	0.285	0
Zfp703	0	0.781099	0.665	0.15	0
Rabac1	0	0.783012	0.934	0.732	0
Mtss1	0	0.78308	0.771	0.408	0
Fgd4	0	0.783814	0.648	0.181	0
Tmem86a	0	0.785142	0.652	0.12	0
Pdlim4	0	0.785834	0.611	0.047	0
Nrros	0	0.786394	0.841	0.428	0
Nfam1	0	0.78734	0.736	0.233	0
Gdi2	0	0.788043	0.977	0.865	0
Ftl1-ps1	0	0.789735	0.853	0.541	0
Prkcd	0	0.790406	0.828	0.468	0
Dock4	0	0.791397	0.655	0.106	0
Glmp	0	0.793648	0.851	0.493	0
Grb2	0	0.795072	0.947	0.768	0
Nfkbiz	0	0.797077	0.708	0.319	0
Vwa5a	0	0.797358	0.717	0.243	0
Eea1	0	0.802386	0.833	0.588	0
Tapbp	0	0.803312	0.818	0.473	0
Olfml3	0	0.803717	0.569	0.083	0
Rragc	0	0.804401	0.839	0.544	0
Gpr183	0	0.805108	0.612	0.072	0
Sh3glb1	0	0.806104	0.969	0.853	0
Cdkn1a	0	0.806139	0.79	0.308	0
Shtn1	0	0.806669	0.644	0.024	0
Grk2	0	0.806791	0.909	0.651	0
Ptgs1	0	0.807105	0.833	0.401	0
Socs3	0	0.807667	0.567	0.131	0
Ifi204	0	0.808022	0.61	0.055	0
Dapk1	0	0.810603	0.705	0.213	0
Rnpep	0	0.811083	0.869	0.549	0
Rasgef1b	0	0.812619	0.63	0.098	0
Cxcr4	0	0.812728	0.621	0.131	0
Arhgap30	0	0.813067	0.839	0.355	0
Hck	0	0.815694	0.71	0.112	0
Anxa4	0	0.817023	0.709	0.229	0
Itpkb	0	0.819657	0.702	0.24	0
Atp6v1e1	0	0.820085	0.959	0.845	0
Camk2d	0	0.82552	0.827	0.262	0
Gpx4	0	0.827539	0.944	0.755	0
Gltp	0	0.828545	0.84	0.572	0
Slamf9	0	0.828894	0.525	0.027	0
Abcc3	0	0.829516	0.667	0.04	0
Rnf150	0	0.832223	0.671	0.102	0
Tnfaip2	0	0.832435	0.769	0.531	0
Dnajb14	0	0.833756	0.782	0.381	0
Tcn2	0	0.834103	0.788	0.293	0
Gadd45g	0	0.835601	0.654	0.328	0
Ccrl2	0	0.83708	0.556	0.09	0
Lpcat2	0	0.837094	0.727	0.196	0
Malat1	0	0.838357	0.995	0.988	0
Macf1	0	0.839445	0.928	0.736	0
Slc11a1	0	0.842274	0.59	0.033	0
Tgfbr2	0	0.842353	0.749	0.255	0
Arhgdia	0	0.84656	0.98	0.854	0
Ppt1	0	0.851454	0.818	0.415	0
Blnk	0	0.851667	0.621	0.029	0
Atp6v1b2	0	0.852394	0.876	0.635	0
Atp1a1	0	0.853108	0.946	0.76	0
Blvra	0	0.853406	0.852	0.559	0
Atp6v0a1	0	0.85425	0.785	0.399	0
Snx10	0	0.854622	0.776	0.276	0
Npc1	0	0.855771	0.746	0.265	0
Txnip	0	0.863304	0.698	0.365	0
Qk	0	0.863933	0.937	0.772	0
Scarb2	0	0.864578	0.787	0.311	0
Ifngr1	0	0.865345	0.893	0.566	0
Capza2	0	0.866327	0.967	0.808	0
Cat	0	0.866584	0.857	0.666	0
Rasa1	0	0.867029	0.851	0.513	0
Fabp5	2.21e-117	0.867607	0.882	0.86	6.46e-113
Tnfaip8	0	0.868147	0.899	0.561	0
Retreg1	0	0.868154	0.728	0.151	0
Litaf	0	0.869203	0.829	0.396	0
Fcgrt	0	0.870303	0.66	0.113	0
Itm2c	0	0.871296	0.876	0.375	0
Rab5c	0	0.871661	0.958	0.84	0
2010111I01Rik	0	0.871898	0.778	0.367	0
Zfp710	0	0.873302	0.774	0.295	0
Rhog	0	0.873346	0.9	0.625	0
Ubl3	0	0.875264	0.878	0.553	0
Ubc	0	0.877367	0.988	0.941	0
Glul	0	0.877495	0.804	0.529	0
Actr3	0	0.877516	0.963	0.764	0
Arl11	0	0.880564	0.711	0.155	0
2610507B11Rik	0	0.880822	0.901	0.662	0
Plec	0	0.881188	0.895	0.459	0
Tcf4	0	0.88215	0.897	0.573	0
Dusp3	0	0.883059	0.75	0.244	0
Sgk1	0	0.883819	0.667	0.154	0
Tm2d2	0	0.884501	0.896	0.577	0
M6pr	0	0.891221	0.92	0.704	0
Mfsd1	0	0.891777	0.851	0.494	0
Xylt2	0	0.892265	0.691	0.129	0
Capns1	0	0.89275	0.966	0.83	0
Dnase1l1	0	0.893777	0.736	0.168	0
Calm1	0	0.897244	0.994	0.948	0
Crlf2	0	0.899004	0.841	0.404	0
Erp29	0	0.903733	0.978	0.821	0
Tgfbr1	0	0.903947	0.744	0.271	0
Laptm4a	0	0.906949	0.964	0.679	0
Ppp1r18	0	0.906959	0.87	0.414	0
Hfe	0	0.909448	0.716	0.074	0
Cd83	0	0.910642	0.614	0.029	0
Mcl1	0	0.910917	0.96	0.856	0
Apbb1ip	0	0.912643	0.895	0.634	0
Tmem176a	0	0.915435	0.632	0.332	0
Gpsm3	0	0.915889	0.859	0.389	0
Ptpn6	0	0.918452	0.919	0.517	0
Ap2s1	0	0.919589	0.966	0.867	0
Pla2g15	0	0.92144	0.75	0.218	0
Pirb	0	0.924812	0.649	0.058	0
Pdgfb	0	0.927745	0.62	0.066	0
Tcirg1	0	0.929582	0.782	0.31	0
Hsd17b4	0	0.92992	0.843	0.503	0
Etv3	0	0.933308	0.665	0.224	0
Cxcl14	0	0.933841	0.423	0.029	0
Rab14	0	0.936902	0.968	0.809	0
Cited2	0	0.939045	0.892	0.626	0
Tmem189	0	0.939543	0.807	0.395	0
Ifi27	0	0.941187	0.601	0.197	0
Snx2	0	0.944764	0.893	0.66	0
Rassf4	0	0.945562	0.71	0.103	0
Adap2	0	0.945872	0.698	0.027	0
P2rx4	0	0.949216	0.801	0.326	0
Btg1	0	0.951094	0.893	0.564	0
Alcam	0	0.952028	0.77	0.144	0
Ccl2	0	0.952631	0.408	0.105	0
Atp6v0e	0	0.953002	0.98	0.877	0
5031439G07Rik	0	0.955227	0.807	0.279	0
Fabp4	0	0.960706	0.305	0.041	0
Epb41l2	0	0.962435	0.839	0.39	0
Cdk14	0	0.969022	0.718	0.138	0
Taldo1	0	0.969604	0.986	0.952	0
Fam20c	0	0.971983	0.663	0.091	0
Ifngr2	0	0.974292	0.857	0.37	0
Atp6ap1	0	0.977768	0.919	0.589	0
Sdc3	0	0.982692	0.764	0.13	0
Arpc5	0	0.983234	0.979	0.859	0
Lgals3bp	0	0.985497	0.733	0.155	0
Cttnbp2nl	0	0.985761	0.783	0.132	0
Slc48a1	0	0.986687	0.91	0.659	0
Slc3a2	0	0.987124	0.957	0.816	0
Clic1	0	0.988368	0.989	0.884	0
Myo1e	0	0.988711	0.668	0.103	0
Lat2	0	0.988765	0.684	0.123	0
Aldh2	0	0.988845	0.957	0.757	0
Ptk2b	0	0.989643	0.836	0.374	0
Stap1	0	0.990261	0.75	0.281	0
Pcp4l1	0	0.991662	0.565	0.039	0
Gng2	0	0.992358	0.879	0.405	0
Tlr13	0	1.00078	0.732	0.025	0
Tgfbi	0	1.00163	0.559	0.079	0
Lpxn	0	1.00844	0.739	0.047	0
Atp6v1g1	0	1.00988	0.976	0.861	0
Csf2rb2	0	1.01377	0.726	0.05	0
Cd207	0	1.01765	0.333	0.014	0
Cd48	0	1.02232	0.864	0.342	0
Ncf2	0	1.02284	0.908	0.375	0
Gns	0	1.02366	0.88	0.341	0
Cd180	0	1.02477	0.74	0.105	0
Soat1	0	1.02849	0.852	0.317	0
Nptn	0	1.02861	0.944	0.63	0
Ptms	0	1.02955	0.949	0.33	0
Plek	0	1.03055	0.874	0.324	0
Nrp1	0	1.03096	0.843	0.182	0
Msrb1	0	1.03139	0.891	0.623	0
Gna12	0	1.03387	0.866	0.478	0
Tnfrsf11a	0	1.03626	0.753	0.071	0
Reep5	0	1.03914	0.968	0.803	0
Pitpna	0	1.04163	0.967	0.795	0
Rbm47	0	1.04392	0.776	0.118	0
Hacd4	0	1.04911	0.816	0.218	0
Tns3	0	1.04924	0.816	0.243	0
Tmem50a	0	1.0509	0.968	0.803	0
Stx7	0	1.05289	0.895	0.446	0
Irf8	0	1.05682	0.86	0.197	0
Nfe2l2	0	1.05719	0.91	0.613	0
Tpp1	0	1.06611	0.925	0.595	0
Osbpl8	0	1.06735	0.821	0.473	0
Mdfic	0	1.06952	0.774	0.139	0
Renbp	0	1.07235	0.826	0.214	0
Tm6sf1	0	1.07741	0.889	0.382	0
Id1	0	1.08006	0.759	0.403	0
Ctla2a	0	1.08051	0.912	0.451	0
Hcls1	0	1.08206	0.892	0.379	0
Clec4a2	0	1.08468	0.702	0.089	0
Shisa5	0	1.08765	0.893	0.382	0
Lyn	0	1.08767	0.888	0.443	0
Neat1	0	1.09231	0.941	0.572	0
Irf2bp2	0	1.09536	0.947	0.69	0
Plod1	0	1.09555	0.82	0.204	0
Gabarap	0	1.09666	0.984	0.929	0
Gsn	0	1.09865	0.96	0.309	0
Npy	0	1.09975	0.487	0.028	0
Atp6v1f	0	1.10437	0.981	0.865	0
Rnf130	0	1.10469	0.946	0.613	0
Gpr65	0	1.10495	0.736	0.1	0
Atp2b1	0	1.10522	0.947	0.712	0
Gm26532	0	1.10598	0.703	0.175	0
Myo5a	0	1.10637	0.853	0.305	0
Asah1	0	1.10715	0.944	0.455	0
Sptssa	0	1.10848	0.94	0.653	0
Uap1l1	0	1.10857	0.851	0.312	0
Por	0	1.10945	0.865	0.508	0
Gpr137b	0	1.11006	0.75	0.118	0
Lamtor1	0	1.11197	0.962	0.783	0
Skap2	0	1.11322	0.912	0.495	0
Rab3il1	0	1.11836	0.888	0.393	0
Zeb2	0	1.12684	0.962	0.748	0
Csf2rb	0	1.13145	0.831	0.228	0
Pea15a	0	1.13206	0.855	0.196	0
Ptpn1	0	1.13282	0.908	0.629	0
Rap2b	0	1.13386	0.879	0.446	0
Irf5	0	1.14045	0.819	0.131	0
Cdc42	0	1.14074	0.991	0.918	0
Rnf13	0	1.14204	0.876	0.326	0
S100a4	0	1.14351	0.816	0.204	0
Inpp5d	0	1.14391	0.901	0.423	0
Ptpra	0	1.14543	0.92	0.596	0
Milr1	0	1.14677	0.857	0.231	0
Lrrc25	0	1.14839	0.81	0.113	0
Ywhah	0	1.1493	0.976	0.881	0
Ctsh	0	1.15244	0.795	0.185	0
Ptpn18	0	1.15314	0.971	0.519	0
Ucp2	0	1.15392	0.982	0.834	0
Fam174a	0	1.15948	0.895	0.423	0
Pltp	0	1.16265	0.711	0.08	0
Ifi207	0	1.16599	0.758	0.043	0
Pkm	0	1.17121	0.993	0.817	0
Glipr1	0	1.17464	0.878	0.351	0
Smagp	0	1.17531	0.816	0.09	0
Arpc3	0	1.1788	0.988	0.932	0
Clta	0	1.18132	0.992	0.912	0
Ptprc	0	1.18133	0.929	0.352	0
Ifitm3	0	1.18602	0.911	0.468	0
Plxdc2	0	1.18959	0.793	0.148	0
Ier5	0	1.19256	0.898	0.498	0
Nckap1l	0	1.19401	0.902	0.364	0
B4galt6	0	1.19698	0.84	0.207	0
Plekho1	0	1.19798	0.883	0.328	0
Slc15a3	0	1.20254	0.749	0.05	0
S100a1	0	1.20474	0.889	0.321	0
Sgpl1	0	1.20814	0.875	0.275	0
Rab32	0	1.21276	0.842	0.278	0
Tnip3	0	1.21996	0.557	0.04	0
Itgam	0	1.22363	0.834	0.153	0
Actb	0	1.22536	1	0.998	0
Sh3bgrl3	0	1.23083	0.992	0.815	0
Anxa3	0	1.23461	0.958	0.394	0
Neurl3	0	1.24542	0.798	0.133	0
Cap1	0	1.24874	0.941	0.545	0
Cd93	0	1.24899	0.877	0.263	0
Fcgr1	0	1.25171	0.788	0.061	0
Skil	0	1.25594	0.862	0.299	0
Cd300a	0	1.25671	0.826	0.166	0
Plxnb2	0	1.25675	0.889	0.216	0
Tmem37	0	1.26362	0.811	0.173	0
Pld3	0	1.27211	0.81	0.254	0
Tnfaip8l2	0	1.27373	0.872	0.242	0
Fuca1	0	1.28156	0.931	0.54	0
Ccr5	0	1.28476	0.613	0.046	0
Gusb	0	1.2887	0.951	0.675	0
Sdc4	0	1.28934	0.824	0.166	0
Myo1f	0	1.29059	0.893	0.241	0
Adam15	0	1.29267	0.897	0.305	0
Otulinl	0	1.29366	0.874	0.233	0
Lair1	0	1.29455	0.813	0.054	0
Vsir	0	1.29966	0.874	0.197	0
Rap2a	0	1.30017	0.848	0.275	0
Tnf	0	1.30432	0.702	0.12	0
Itgav	0	1.30833	0.901	0.239	0
Wwp1	0	1.31054	0.903	0.485	0
Card19	0	1.31893	0.885	0.333	0
Ncf1	0	1.32182	0.924	0.258	0
Ccnd1	0	1.32312	0.875	0.371	0
Itgb2	0	1.32319	0.902	0.257	0
Igfbp4	0	1.32328	0.947	0.475	0
Slc7a8	0	1.3311	0.836	0.097	0
Cyfip1	0	1.33819	0.936	0.485	0
Arrb2	0	1.3431	0.922	0.375	0
Rnh1	0	1.35092	0.95	0.71	0
Mef2a	0	1.35398	0.933	0.517	0
Bst2	0	1.35445	0.93	0.576	0
Ifitm2	0	1.35455	0.98	0.716	0
Cd9	0	1.36332	0.929	0.47	0
Klf6	0	1.36389	0.948	0.546	0
Cfh	0	1.37817	0.85	0.093	0
Anxa5	0	1.37996	0.977	0.478	0
Il10rb	0	1.38082	0.913	0.358	0
Cyth4	0	1.3882	0.918	0.298	0
Marcks	0	1.39002	0.958	0.368	0
Cebpb	0	1.3908	0.937	0.51	0
App	0	1.40536	0.95	0.281	0
Creg1	0	1.41106	0.981	0.884	0
Evi2a	0	1.41269	0.882	0.191	0
Gnai2	0	1.41365	0.991	0.903	0
Ostf1	0	1.41757	0.974	0.743	0
Gpr137b-ps	0	1.42132	0.842	0.125	0
Dhrs3	0	1.42179	0.873	0.137	0
Ms4a6c	0	1.43051	0.829	0.149	0
Atp6v1a	0	1.43361	0.958	0.652	0
Tmem106a	0	1.43771	0.865	0.073	0
Pmp22	0	1.44405	0.829	0.118	0
Pf4	0	1.44853	0.888	0.289	0
Lamp2	0	1.46175	0.971	0.575	0
Cndp2	0	1.46583	0.926	0.488	0
Apobec1	0	1.4751	0.874	0.094	0
Camk1	0	1.48173	0.911	0.347	0
Hgsnat	0	1.49467	0.73	0.29	0
Ifi27l2a	0	1.49779	0.4	0.056	0
Atp6v0c	0	1.50502	0.993	0.935	0
Atox1	0	1.50909	0.983	0.875	0
Rcbtb2	0	1.51739	0.926	0.455	0
Lilr4b	0	1.51779	0.829	0.084	0
Pou2f2	0	1.52193	0.901	0.29	0
Rgs2	0	1.52766	0.937	0.437	0
Rtn4	0	1.53473	0.984	0.776	0
Rab7b	0	1.54614	0.84	0.083	0
Arpc2	0	1.54932	0.992	0.876	0
BC005537	0	1.55025	0.972	0.778	0
Nfkbia	0	1.55533	0.94	0.596	0
Itga6	0	1.56062	0.933	0.375	0
Clec12a	0	1.56853	0.934	0.216	0
Sat1	0	1.57495	0.962	0.524	0
Cd84	0	1.57874	0.878	0.137	0
Spp1	0	1.58093	0.793	0.142	0
Slc43a2	0	1.5825	0.901	0.172	0
Pik3ap1	0	1.58254	0.902	0.196	0
H2-K1	0	1.58936	0.965	0.622	0
Bri3	0	1.59287	0.979	0.743	0
Iqgap1	0	1.59288	0.98	0.67	0
Slfn2	0	1.59496	0.886	0.166	0
Ccl3	0	1.59568	0.847	0.307	0
Pld4	0	1.60022	0.877	0.125	0
Msr1	0	1.6082	0.861	0.041	0
Fcgr3	0	1.61065	0.925	0.257	0
Nceh1	0	1.61193	0.895	0.217	0
Arl4c	0	1.61413	0.909	0.223	0
Tmem176b	0	1.61923	0.799	0.397	0
Lst1	0	1.62062	0.962	0.433	0
Atp6v0b	0	1.62372	0.987	0.875	0
Gngt2	0	1.63661	0.912	0.149	0
Smpdl3a	0	1.63988	0.806	0.271	0
B2m	0	1.64314	0.989	0.812	0
P2ry6	0	1.64377	0.905	0.06	0
Slc37a2	0	1.64805	0.872	0.063	0
Arpc1b	0	1.65157	0.989	0.777	0
Alox5ap	0	1.65586	0.964	0.397	0
Cd63	0	1.65619	0.985	0.606	0
Sdcbp	0	1.67348	0.985	0.855	0
Zfp36l1	0	1.6764	0.921	0.495	0
Cd52	0	1.68081	0.975	0.425	0
Cotl1	0	1.68107	0.98	0.609	0
Spi1	0	1.70415	0.976	0.425	0
Basp1	0	1.70721	0.973	0.343	0
Colec12	0	1.70808	0.859	0.132	0
Lamp1	0	1.70857	0.991	0.845	0
Cfp	0	1.71862	0.886	0.131	0
Npc2	0	1.72301	0.987	0.809	0
Tpd52	0	1.73223	0.968	0.472	0
Sash1	0	1.74026	0.93	0.18	0
Prdx1	0	1.75527	0.995	0.9	0
Unc93b1	0	1.76171	0.951	0.289	0
Pid1	0	1.76847	0.902	0.123	0
Cd36	0	1.78203	0.834	0.062	0
Akr1a1	0	1.78755	0.986	0.84	0
Cd53	0	1.79125	0.966	0.339	0
Itgb5	0	1.80644	0.946	0.19	0
Ccl9	0	1.80683	0.87	0.229	0
Nrp2	0	1.81173	0.919	0.098	0
Mpeg1	0	1.82219	0.819	0.095	0
Stab1	0	1.82845	0.855	0.087	0
Ehd4	0	1.83458	0.96	0.539	0
Rgs10	0	1.8397	0.977	0.628	0
Hpgds	0	1.84046	0.932	0.106	0
Aif1	0	1.85883	0.899	0.064	0
Man2b1	0	1.86064	0.972	0.586	0
Plin2	0	1.87624	0.972	0.75	0
Cybb	0	1.87665	0.925	0.147	0
Fos	0	1.88972	0.959	0.587	0
Ctsl	0	1.91311	0.974	0.527	0
Syngr1	0	1.91346	0.907	0.315	0
Junb	0	1.92567	0.964	0.65	0
Hexb	0	1.93173	0.932	0.296	0
Emp3	0	1.93193	0.986	0.761	0
Fyb	0	1.93563	0.965	0.384	0
Metrnl	0	1.96483	0.919	0.115	0
Ctsc	0	2.00319	0.962	0.437	0
Mrc1	0	2.00546	0.856	0.058	0
Ccl4	0	2.00558	0.73	0.201	0
Hmox1	0	2.03298	0.93	0.172	0
Ctsz	0	2.0387	0.982	0.737	0
Zfp36	0	2.03899	0.972	0.57	0
Lrp1	0	2.04382	0.97	0.225	0
Cadm1	0	2.05419	0.925	0.079	0
Itm2b	0	2.11285	0.994	0.882	0
Atf3	0	2.1233	0.895	0.141	0
Serpinb6a	0	2.1263	0.969	0.363	0
Id3	0	2.15215	0.923	0.221	0
Bcl2a1b	0	2.15225	0.861	0.047	0
Slc6a6	0	2.176	0.977	0.523	0
Ms4a6d	0	2.19892	0.943	0.074	0
Maf	0	2.20563	0.944	0.117	0
Ctsa	0	2.21221	0.976	0.575	0
Lcp1	0	2.23345	0.989	0.482	0
Abhd12	0	2.2369	0.964	0.346	0
Mafb	0	2.25151	0.93	0.089	0
Cxcl16	0	2.25361	0.94	0.074	0
H2-D1	0	2.27072	0.983	0.712	0
Fxyd5	0	2.28739	0.981	0.52	0
Ftl1	0	2.29273	0.999	0.993	0
Dusp1	0	2.3016	0.958	0.585	0
Cyba	0	2.30212	0.992	0.721	0
C5ar1	0	2.33914	0.937	0.068	0
Cx3cr1	0	2.34817	0.832	0.124	0
Efhd2	0	2.35421	0.982	0.69	0
Capg	0	2.3687	0.966	0.442	0
Tmsb4x	0	2.38009	1	0.941	0
Hexa	0	2.38101	0.978	0.533	0
Cstb	0	2.3813	0.983	0.621	0
Cd14	0	2.43407	0.922	0.079	0
Psap	0	2.44111	0.987	0.711	0
Adam8	0	2.45134	0.93	0.077	0
Cd300c2	0	2.49084	0.96	0.084	0
Clec4d	0	2.51246	0.958	0.19	0
Adgre1	0	2.65212	0.965	0.103	0
Laptm5	0	2.72049	0.992	0.55	0
Cd72	0	2.72407	0.938	0.064	0
Fth1	0	2.75787	1	0.996	0
Sirpa	0	2.76841	0.98	0.314	0
Cst3	0	2.78622	0.995	0.821	0
Id2	0	2.82029	0.972	0.278	0
C3ar1	0	2.82372	0.963	0.076	0
Ckb	0	2.83037	0.975	0.283	0
Rgs1	0	2.86557	0.956	0.3	0
Selenop	0	2.9107	0.978	0.335	0
Grn	0	2.93182	0.982	0.358	0
Igf1	0	3.00275	0.965	0.078	0
Hpgd	0	3.05603	0.948	0.109	0
Lipa	0	3.06456	0.979	0.381	0
Dab2	0	3.07428	0.969	0.137	0
Cxcl2	0	3.16431	0.789	0.122	0
Csf1r	0	3.23144	0.98	0.222	0
Gpnmb	0	3.23146	0.826	0.125	0
Lgmn	0	3.24958	0.975	0.189	0
Cd68	0	3.28309	0.974	0.207	0
Tyrobp	0	3.44255	0.995	0.488	0
Lpl	0	3.45757	0.95	0.159	0
Fcrls	0	3.50939	0.963	0.076	0
Ctss	0	3.53321	0.98	0.14	0
Wfdc17	0	3.69533	0.952	0.142	0
Fcer1g	0	3.73175	0.993	0.496	0
Lgals3	0	3.87706	0.951	0.203	0
Ctsd	0	3.93537	0.995	0.85	0
Ctsb	0	3.97703	0.995	0.84	0
Trem2	0	4.07287	0.979	0.128	0
Ms4a7	0	4.14332	0.976	0.089	0
Lyz2	0	4.44232	0.994	0.538	0
C1qc	0	4.76354	0.98	0.118	0
Apoe	0	4.94207	0.99	0.702	0
C1qa	0	4.9787	0.976	0.114	0
C1qb	0	5.1626	0.98	0.136	0
